# Supplementary material for: The assessment of internal adaptation and fracture resistance of glass ionomer and resin-based restorative materials applied after different caries removal techniques in primary teeth: an in-vitro study
Source: PeerJ. 2023 Mar 28;11:e14825. doi: 10.7717/peerj.14825 (PMC10064991; doi:10.7717/peerj.14825)
Supplement: Supplemental Information 1 [file peerj-11-14825-s001.xlsx]

## Sheet: Sayfa1
Restorative Materials	Caries Removal Technique	Sample No	Internal Voids (%)	Fracture Resistance
				(Newton)
Group 1 - Glass Hybrid Restorative (GHR) (Equia Forte® HT)	Conventional Caries Removal to Sound Dentin (CCRSD)	1	2.59	387
		2	2.32	381
		3	2.7	362
		4	2.35	356
		5	2.2	371
	Selective Caries Removal to Firm Dentin (SCRFD)	6	3.75	344
		7	3.9	365
		8	3.71	349
		9	3.11	388
		10	3.6	379
Group 2 - Conventional Glass Ionomer Restorative (CGIR) (Ionofil Molar)	CCRSD	11	2.56	318
		12	2.31	329
		13	2.58	330
		14	2.83	311
		15	2.81	339
	SCRFD	16	3.24	316
		17	4	301
		18	3.23	315
		19	4	321
		20	3.91	325
Group 3 - Compomer (Dyract XP)	CCRSD	21	1.91	439
		22	1.96	460
		23	1.79	429
		24	1.63	442
		25	1.91	430
	SCRFD	26	3.1	454
		27	3.2	412
		28	3.7	438
		29	3.6	449
		30	3.4	469
